# Supplementary material for: A computational study of the properties of low- and high-index Pd, Cu and Zn surfaces
Source: Royal Society of Chemistry journal article supplement (doi:10.1039/d1cp01602d), 2021-01-01
Supplement: d1cp01602d1.pdf [file d1cp01602d1.pdf]

Supporting Information for:

**A computational study of the properties of low- and high-index Pd, Cu and Zn surfaces**

Lara Kabalan<sup>1</sup>, Igor Kowalec<sup>1</sup>, C. Richard A. Catlow<sup>1,2,3</sup> and Andrew J. Logsdail<sup>1,\*</sup>

<sup>1</sup> Cardiff Catalysis Institute, School of Chemistry, Cardiff University, Park Place, Cardiff, CF10 3AT, Wales, UK

<sup>2</sup> Department of Chemistry, University College London, 20 Gordon Street, London, WC1E 6BT, UK

<sup>3</sup> UK Catalysis Hub, Research Complex at Harwell, Rutherford Appleton Laboratory, Didcot, OX11 0FA, UK

**Correspondence address: [LogsdailA@cardiff.ac.uk](mailto:LogsdailA@cardiff.ac.uk)**

## I. Figures

Figure S1. The Pd (111) surface facet (FCC). Left: View of the surface  $xy$ -plane; Right: View perpendicular to the surface along the  $yz$ -plane. The  $1 \times 1 \times 7$  unit cell is shown with a dotted line, including  $20 \text{ \AA}$  vacuum above and below the surface; to aid viewing of the surface, the model has been replicated twofold, giving a supercell view, in the directions of the surface plane.

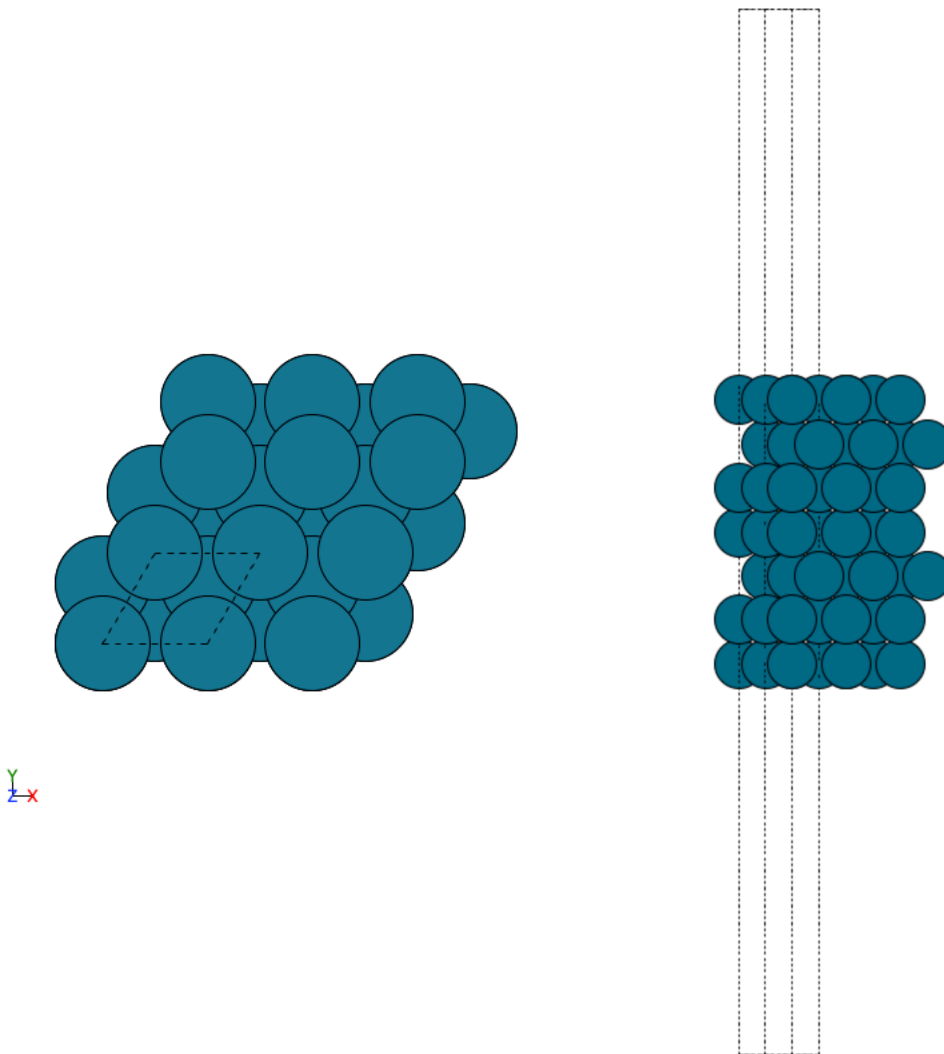

Figure S2. The Pd (100) surface facet (FCC). Left: View of the surface  $xy$ -plane; Right: View perpendicular to the surface along the  $yz$ -plane. The  $1 \times 1 \times 7$  unit cell is shown with a dotted line, including  $20 \text{ \AA}$  vacuum above and below the surface; to aid viewing of the surface, the model has been replicated twofold, giving a supercell view, in the directions of the surface plane.

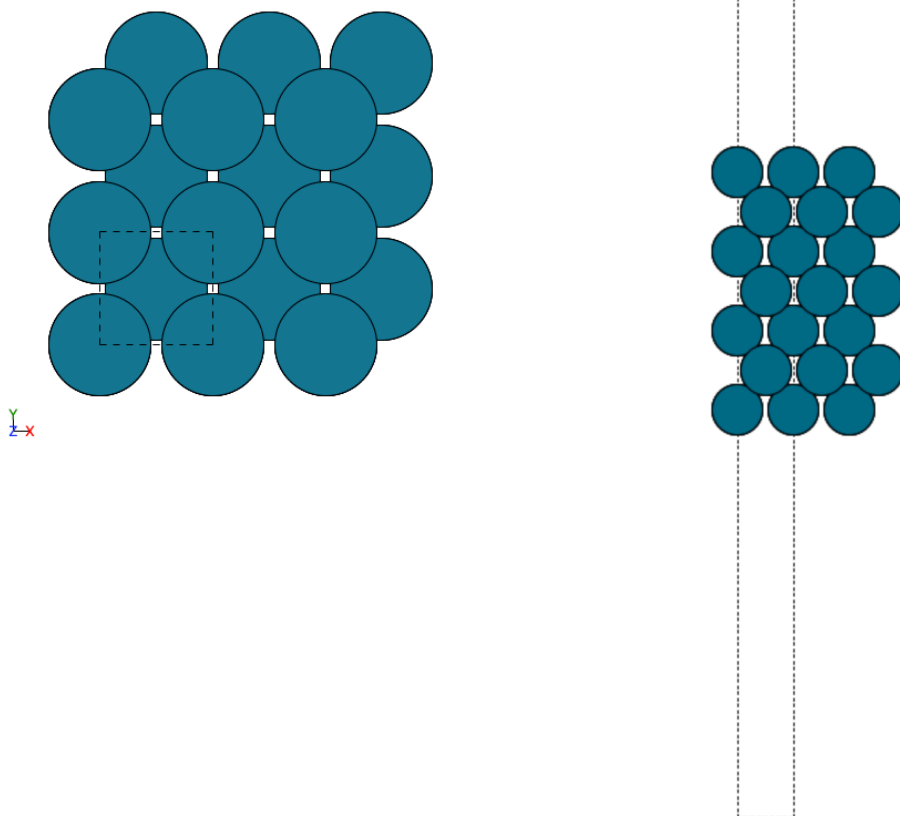

Figure S3. The Pd (110) surface facet (FCC). Left: View of the surface  $xy$ -plane; Right: View perpendicular to the surface along the  $yz$ -plane. The  $1 \times 1 \times 7$  unit cell is shown with a dotted line, including  $20 \text{ \AA}$  vacuum above and below the surface; to aid viewing of the surface, the model has been replicated twofold, giving a supercell view, in the directions of the surface plane.

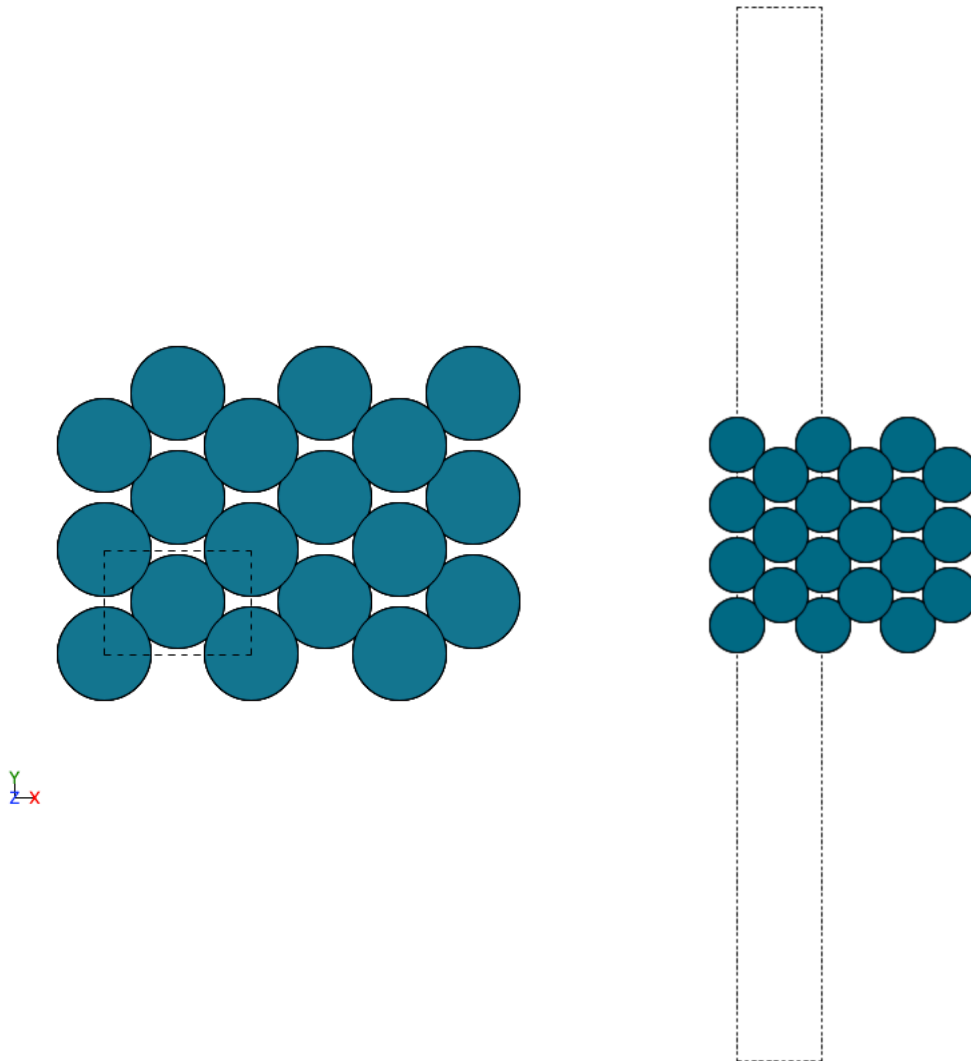

Figure S4. The Zn (0001) surface facet (HCP). Left: View of the surface  $xy$ -plane; Right: View perpendicular to the surface along the  $yz$ -plane. The  $1 \times 1 \times 7$  unit cell is shown with a dotted line, including  $20 \text{ \AA}$  vacuum above and below the surface; to aid viewing of the surface, the model has been replicated twofold, giving a supercell view, in the directions of the surface plane.

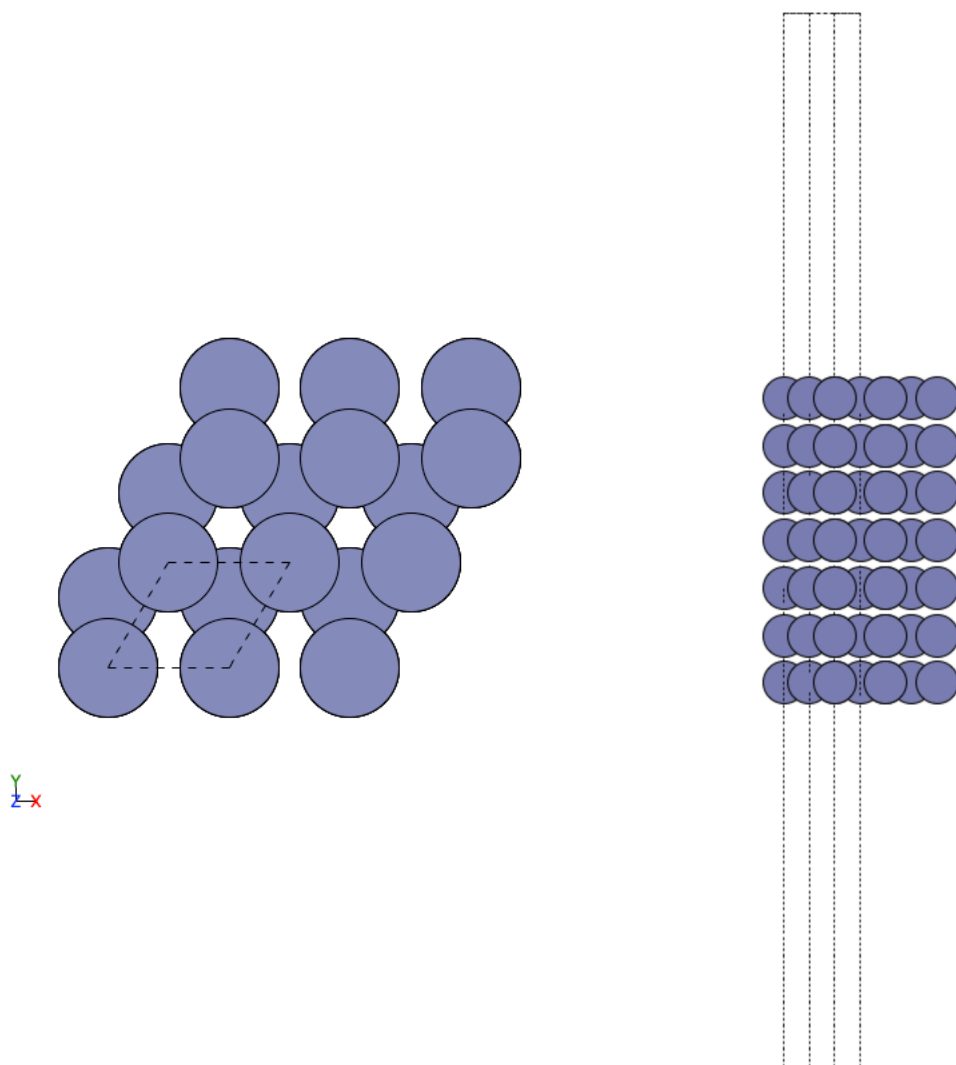

Figure S5. The Zn (10-10) surface facet (HCP). Left: View of the surface  $xy$ -plane; Right: View perpendicular to the surface along the  $yz$ -plane. The  $1 \times 2 \times 7$  unit cell is shown with a dotted line, including  $20 \text{ \AA}$  vacuum above and below the surface; to aid viewing of the surface, the model has been replicated twofold, giving a supercell view, in the directions of the surface plane.

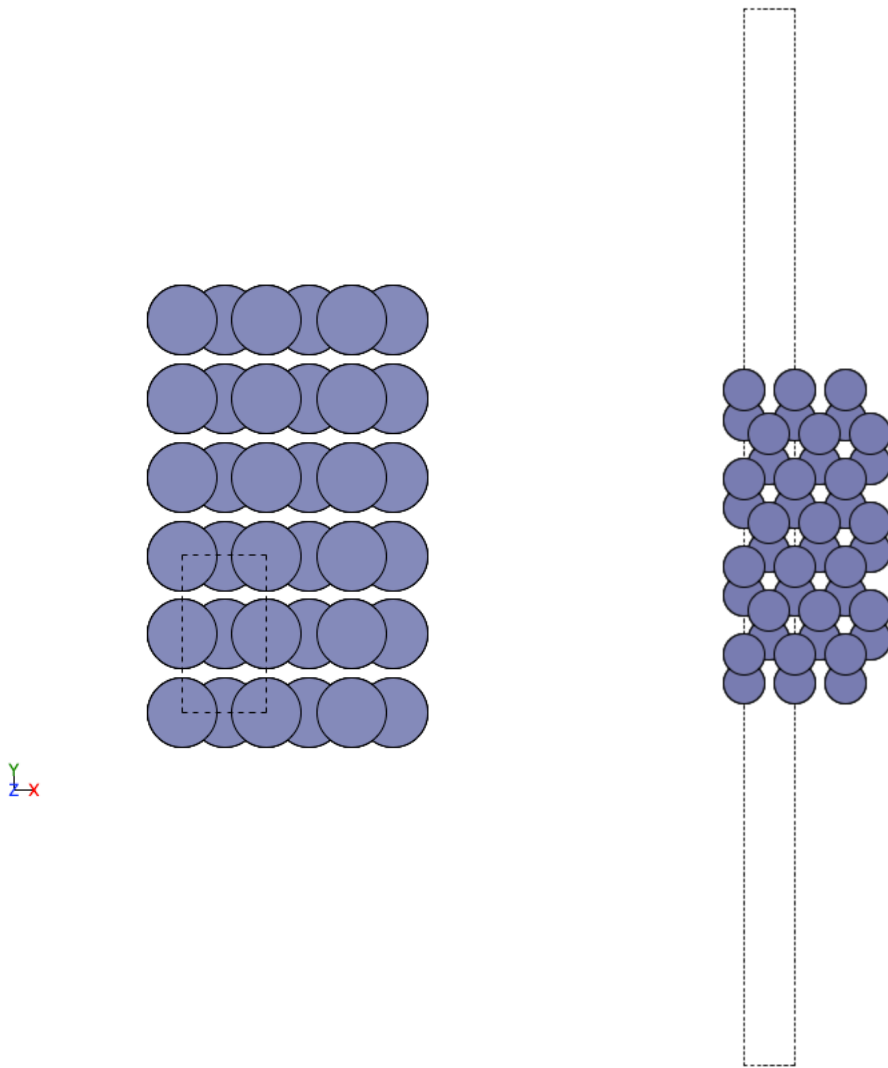

Figure S6. The surface energy ( $\text{Jm}^{-2}$ ) for Cu (111), (100) and (110) facets, given in the top, middle and bottom graphs, respectively, as function of  $\mathbf{k}$ -grid density ( $\text{\AA}^{-1}$ ) in the  $x$ - and  $y$ -directions. A key is given to show how many layers (5-10) were considered in the respective models.

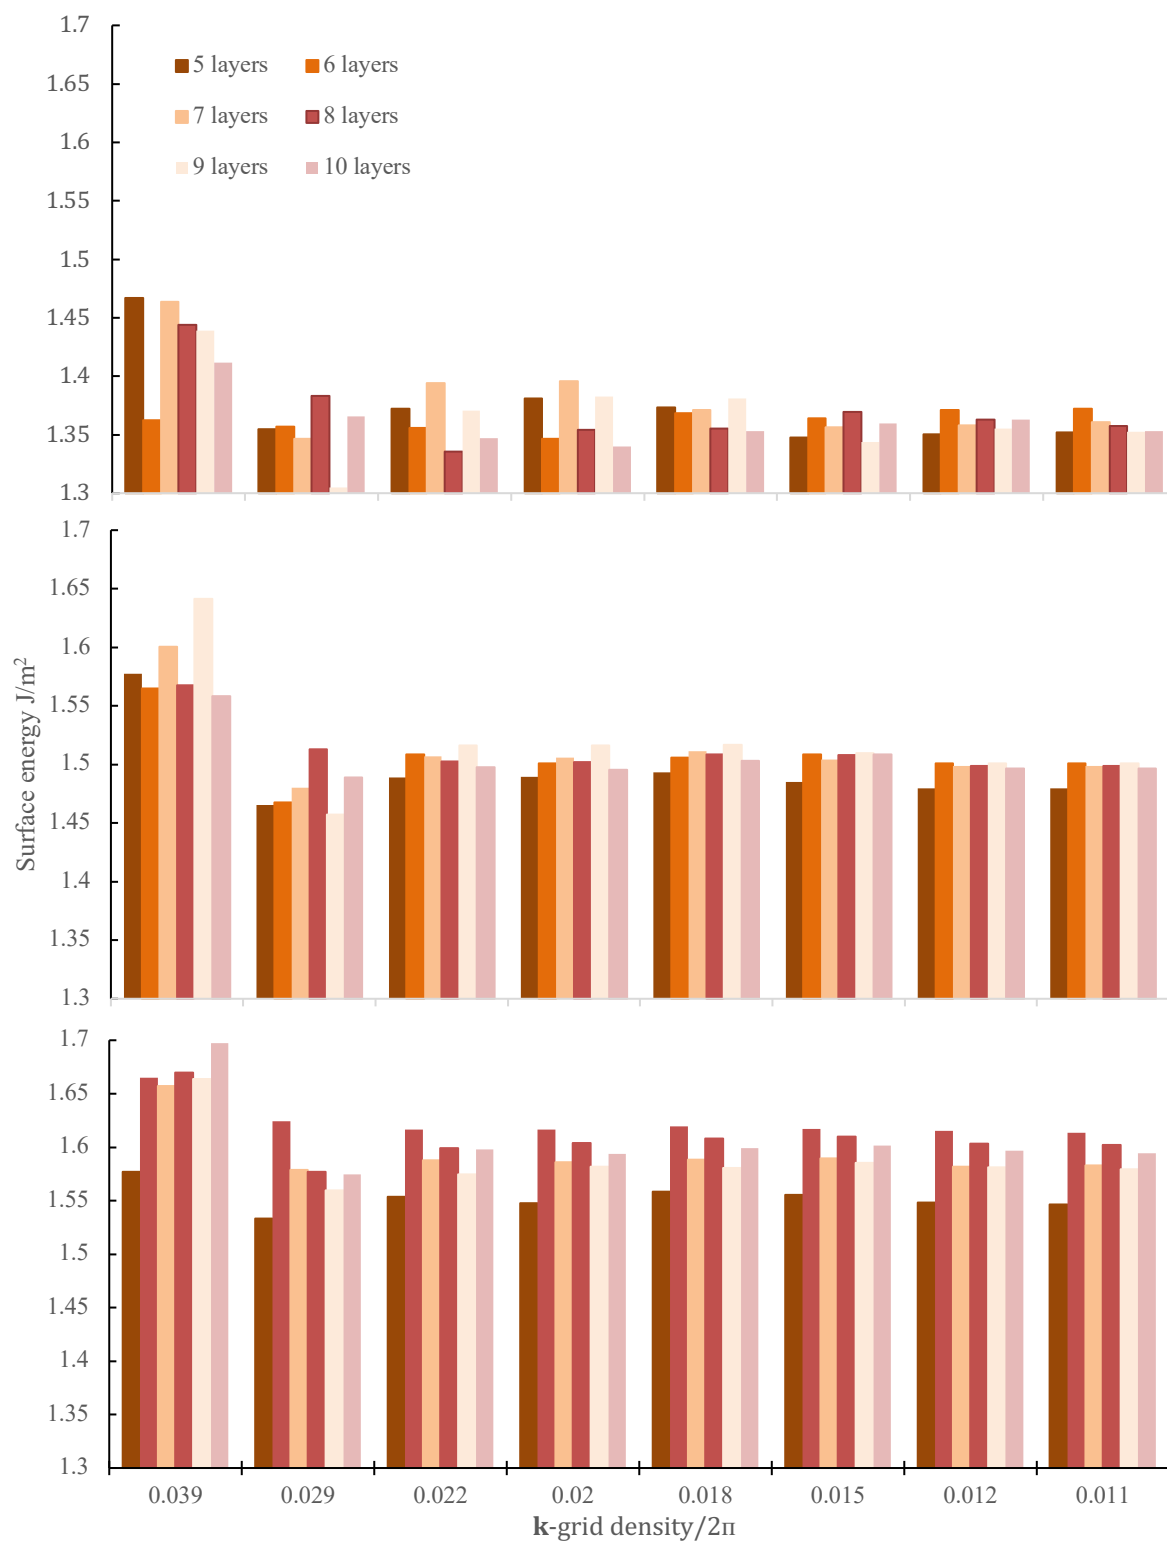

Figure S7. The surface energy ( $\text{Jm}^{-2}$ ) for Zn (0001) and (10-10) facets, given in the top and bottom graphs, respectively, as function of  $\mathbf{k}$ -grid density ( $\text{\AA}^{-1}$ ) in the x- and y-directions. A key is given to show how many layers (5-10) were considered in the respective models.

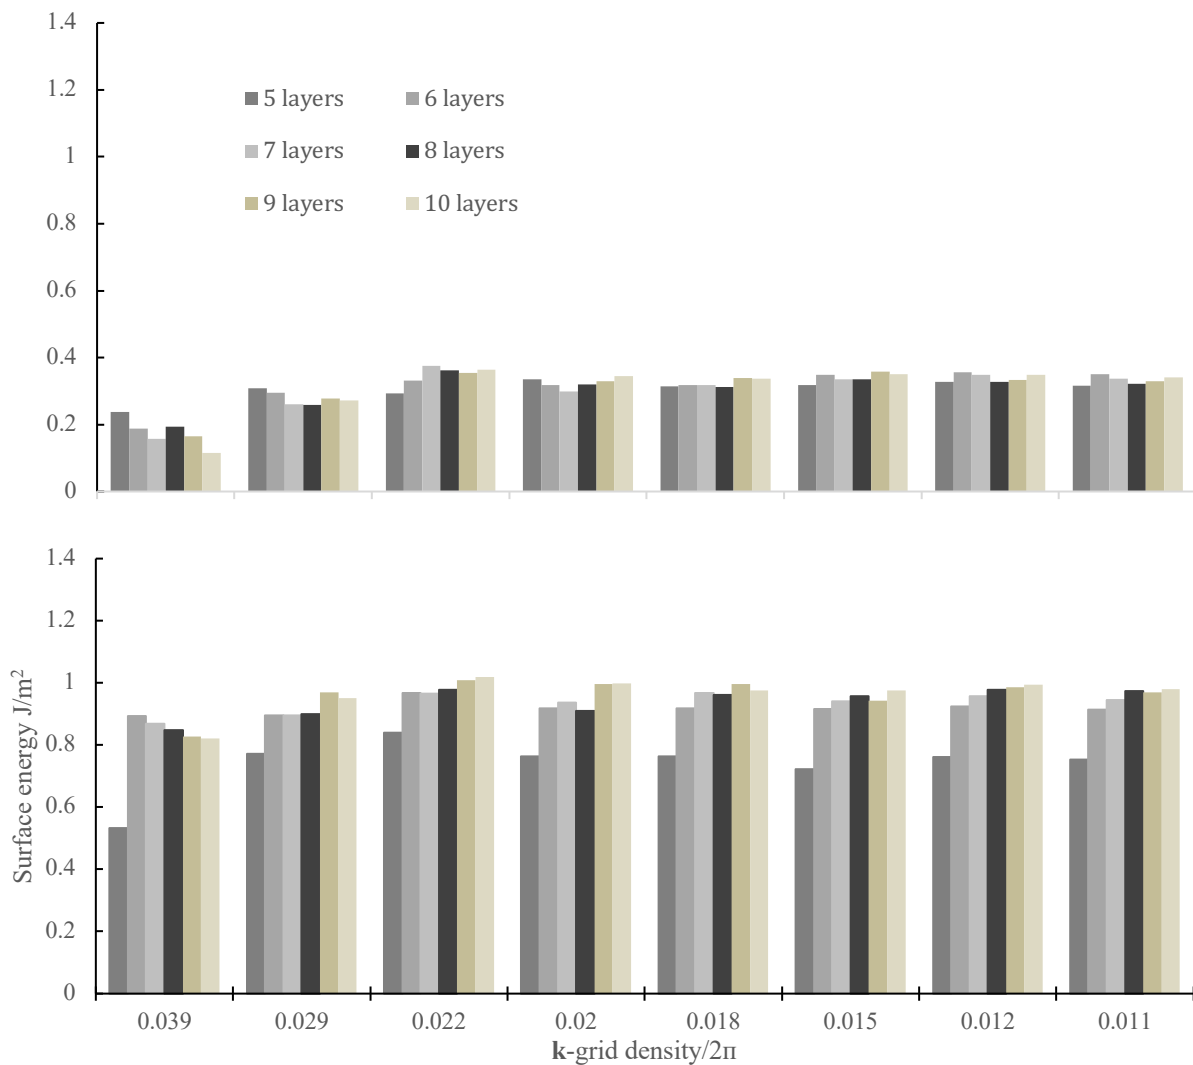



## II. Tables

Table S1. Lattice parameters ( $a_0$ , given in Å) and cohesive energies ( $E_{\text{coh}}$ , given in eV/atom) calculated for Pd with different exchange functionals.  $\Delta a_0$  and  $\Delta E_{\text{coh}}$  are differences (%), and defined such that a negative sign indicates that the calculated value is lower than experiment. The MPAE is as defined in the main manuscript.

|          |                            | $a_0$                    | $\Delta a_0$             | $E_{\text{coh}}$         | $\Delta E_{\text{coh}}$   | MPAE                     |
|----------|----------------------------|--------------------------|--------------------------|--------------------------|---------------------------|--------------------------|
| GGA      | PBE<br>(+TS)<br>(+MBD-NL)  | 3.93<br>(3.90)<br>(3.92) | 1.18<br>(0.41)<br>(0.80) | 3.73<br>(4.00)<br>(3.98) | -4.11<br>(2.82)<br>(2.54) | 2.65<br>(1.61)<br>(1.67) |
|          | PBEsol                     | 3.87                     | -0.53                    | 4.48                     | 15.29                     | 7.91                     |
|          | PBEint                     | 3.97                     | 2.106                    | 3.31                     | -14.83                    | 8.47                     |
|          | revPBE                     | 3.96                     | 1.84                     | 3.22                     | -17.22                    | 9.53                     |
|          | PW91                       | 4.03                     | 3.52                     | 2.99                     | -23.11                    | 13.31                    |
|          | RPBE                       | 3.98                     | 2.132                    | 3.10                     | -20.20                    | 11.17                    |
|          | R48PBE                     | 4.05                     | 4.13                     | 2.66                     | -31.44                    | 17.78                    |
|          | B97-D                      | 3.99                     | 2.414                    | 2.69                     | -30.74                    | 16.58                    |
|          | BLYP                       | 4.02                     | 3.40                     | 3.01                     | -22.62                    | 13.01                    |
|          | HCTH-407                   | 3.96                     | 1.85                     | 2.30                     | -40.87                    | 21.36                    |
| Meta-GGA | mBEEF                      | 3.88                     | -0.13                    | 3.57                     | -8.15                     | 4.14                     |
|          | TPSS                       | 3.89                     | 0.12                     | 4.35                     | 11.90                     | 6.01                     |
|          | revSCAN                    | 3.90                     | 0.20                     | 4.30                     | 10.54                     | 5.37                     |
|          | SCAN                       | 3.88                     | -0.12                    | 4.35                     | 11.90                     | 6.01                     |
|          | revTPSS                    | 3.87                     | -0.53                    | 4.39                     | 12.98                     | 6.76                     |
|          | TPSSloc                    | 3.82                     | -1.85                    | 4.96                     | 27.48                     | 14.66                    |
| Hybrid   | HSE06                      | 3.92                     | 0.87                     | 3.05                     | -21.59                    | 11.23                    |
|          | PBE0<br>(+TS)              | 3.90<br>(3.87)           | 0.30<br>(-0.41)          | 2.94<br>(3.20)           | -24.42<br>(-17.73)        | 12.36<br>(9.07)          |
|          | B3LYP                      | 3.98                     | 2.36                     | 2.50                     | -35.73                    | 19.04                    |
| Exp.     | Gražulis <i>et al.</i> [1] | 3.893                    | -                        | -                        | -                         | -                        |
|          | Kittel [2]                 | -                        | -                        | 3.89                     | -                         | -                        |

Table S2. Lattice parameters ( $a_0$ , given in Å) and cohesive energies ( $E_{\text{coh}}$ , given in eV/atom) calculated for Cu with different exchange functionals.  $\Delta a_0$  and  $\Delta E_{\text{coh}}$  are differences (%), and defined such that a negative sign indicates that the calculated value is lower than experiment. The MPAE is as defined in the main manuscript.

|          |                            | $a_0$                    | $\Delta a_0$              | $E_{\text{coh}}$         | $\Delta E_{\text{coh}}$    | MPAE                      |
|----------|----------------------------|--------------------------|---------------------------|--------------------------|----------------------------|---------------------------|
| GGA      | PBE<br>(+TS)<br>(+MBD-NL)  | 3.63<br>(3.54)<br>(3.60) | 0.47<br>(1.83)<br>(-0.49) | 3.53<br>(4.14)<br>(3.86) | 1.14<br>(18.62)<br>(10.60) | 0.80<br>(10.22)<br>(5.54) |
|          | PBEsol                     | 3.56                     | -1.38                     | 4.09                     | 17.19                      | 9.29                      |
|          | PBEint                     | 3.55                     | -1.77                     | 4.19                     | 20.03                      | 10.90                     |
|          | revPBE                     | 3.66                     | 1.32                      | 3.13                     | -10.31                     | 5.82                      |
|          | PW91                       | 3.60                     | -0.22                     | 3.87                     | 10.86                      | 5.54                      |
|          | RPBE                       | 3.67                     | 1.66                      | 3.05                     | -12.60                     | 7.14                      |
|          | R48PBE                     | 3.61                     | 0.02                      | 3.62                     | 3.75                       | 1.89                      |
|          | B97-D                      | 3.68                     | 2.01                      | 2.82                     | -19.23                     | 10.62                     |
|          | BLYP                       | 3.70                     | 2.51                      | 2.51                     | -28.08                     | 15.30                     |
|          | HCTH-407                   | 3.66                     | 1.33                      | 2.63                     | -24.64                     | 12.98                     |
| Meta-GGA | mBEEF                      | 3.57                     | -1.05                     | 3.52                     | 0.80                       | 0.93                      |
|          | TPSS                       | 3.57                     | -1.05                     | 3.83                     | 9.77                       | 5.41                      |
|          | revSCAN                    | 3.56                     | -1.35                     | 3.91                     | 12.09                      | 6.72                      |
|          | SCAN                       | 3.55                     | -1.57                     | 3.97                     | 14.01                      | 7.79                      |
|          | revTPSS                    | 3.55                     | -1.77                     | 4.18                     | 19.74                      | 10.76                     |
|          | TPSSloc                    | 3.50                     | -2.99                     | 4.58                     | 31.23                      | 17.11                     |
| Hybrid   | HSE06                      | 3.63                     | 0.50                      | 3.18                     | -8.88                      | 4.69                      |
|          | PBE0<br>(+TS)              | 3.63<br>(3.83)           | 0.39<br>(6.09)            | 3.14<br>(3.71)           | -10.03<br>(6.30)           | 5.21<br>(6.19)            |
|          | B3LYP                      | 3.61                     | -0.14                     | 2.65                     | -24.07                     | 12.10                     |
| Exp.     | Gražulis <i>et al.</i> [1] | 3.614                    | -                         | -                        | -                          | -                         |
|          | Kittel [2]                 | -                        | -                         | 3.49                     | -                          | -                         |

Table S3. Lattice parameters ( $a_0$  and  $c_0$ , given in Å) and cohesive energies ( $E_{\text{coh}}$ , given in eV/atom) calculated for Zn with different exchange functionals.  $\Delta a_0$ ,  $\Delta c_0$  and  $\Delta E_{\text{coh}}$  are differences (%), and defined such that a negative sign indicates that the calculated value is lower than experiment. The MPAE is as defined in the main manuscript.

|          |                            | $a_0$                    | $\Delta a_0$             | $c_0$                    | $\Delta c_0$             | $E_{\text{coh}}$         | $\Delta E_{\text{coh}}$     | MPAE                     |
|----------|----------------------------|--------------------------|--------------------------|--------------------------|--------------------------|--------------------------|-----------------------------|--------------------------|
| GGA      | PBE<br>(+TS)<br>(+MBD-NL)  | 2.78<br>(2.71)<br>(2.75) | 4.59<br>(1.93)<br>(3.45) | 5.17<br>(5.04)<br>(5.12) | 4.54<br>(1.88)<br>(3.40) | 1.09<br>(1.51)<br>(1.36) | -19.26<br>(11.70)<br>(0.74) | 9.46<br>(5.17)<br>(2.53) |
|          | PBEsol                     | 2.72                     | 2.20                     | 5.06                     | 2.15                     | 1.59                     | 17.92                       | 7.42                     |
|          | PBEint                     | 2.78                     | 4.70                     | 5.18                     | 4.65                     | 1.14                     | -15.41                      | 8.25                     |
|          | revPBE                     | 2.81                     | 5.79                     | 5.23                     | 5.73                     | 0.78                     | -42.15                      | 17.89                    |
|          | PW91                       | 2.84                     | 6.91                     | 5.29                     | 6.85                     | 0.87                     | -35.55                      | 16.43                    |
|          | RPBE                       | 2.83                     | 6.27                     | 5.26                     | 6.22                     | 0.72                     | -46.44                      | 19.46                    |
|          | R48PBE                     | 2.87                     | 7.81                     | 5.33                     | 7.76                     | 0.69                     | -48.59                      | 21.38                    |
|          | B97-D                      | 2.88                     | 8.42                     | 5.36                     | 8.37                     | 0.33                     | -75.55                      | 30.78                    |
|          | BLYP                       | 2.88                     | 8.40                     | 5.36                     | 8.34                     | 0.31                     | -76.96                      | 31.23                    |
|          | HCTH-407                   | 2.82                     | 6.08                     | 5.25                     | 6.03                     | 0.38                     | -71.48                      | 27.86                    |
| Meta-GGA | mBEEF                      | 2.73                     | 2.81                     | 5.09                     | 2.76                     | 1.32                     | -2.22                       | 2.59                     |
|          | TPSS                       | 2.73                     | 2.70                     | 5.08                     | 2.66                     | 1.35                     | 0.00                        | 1.78                     |
|          | revSCAN                    | 2.75                     | 3.26                     | 5.11                     | 3.21                     | 1.39                     | 2.67                        | 3.04                     |
|          | SCAN                       | 2.71                     | 1.80                     | 5.04                     | 1.76                     | 1.47                     | 9.26                        | 4.27                     |
|          | revTPSS                    | 2.70                     | 1.72                     | 5.03                     | 1.67                     | 1.62                     | 20.00                       | 7.79                     |
|          | TPSSloc                    | 2.67                     | 0.29                     | 4.96                     | 0.24                     | 2.03                     | 50.59                       | 17.03                    |
| Hybrid   | HSE06                      | 2.78                     | 4.67                     | 5.18                     | 4.62                     | 1.14                     | -15.40                      | 8.23                     |
|          | PBE0<br>(+TS)              | 2.78<br>(2.71)           | 4.54<br>(1.93)           | 5.17<br>(5.04)           | 4.49<br>(1.88)           | 1.14<br>(1.54)           | -15.70<br>(13.70)           | 8.24<br>(5.84)           |
|          | B3LYP                      | 2.85                     | 7.14                     | 5.30                     | 7.09                     | 0.44                     | -67.55                      | 27.26                    |
| Exp.     | Gražulis <i>et al.</i> [1] | 2.665                    | -                        | 4.947                    | -                        | -                        | -                           | -                        |
|          | Kittel [2]                 | -                        | -                        | -                        | -                        | 1.35                     | -                           | -                        |

Table S4: MPAE for each density functional when applied to calculate equilibrium bulk structures, and associated cohesive energy, of Pd, Cu and Zn. The results are ordered descending, from best to worst, with respect to the MPAE within each DF approximation sub-category (GGA, meta-GGA, hybrid).

| DF       |                           | MPAE                     |                           |                          |                          |
|----------|---------------------------|--------------------------|---------------------------|--------------------------|--------------------------|
|          |                           | Pd                       | Cu                        | Zn                       | Mean                     |
| GGA      | PBE<br>(+TS)<br>(+MBD-NL) | 2.65<br>(1.61)<br>(1.67) | 0.80<br>(10.22)<br>(5.54) | 9.46<br>(5.17)<br>(2.53) | 4.30<br>(5.67)<br>(3.25) |
|          | PBEsol                    | 7.91                     | 9.29                      | 7.42                     | 8.21                     |
|          | PBEint                    | 8.47                     | 10.90                     | 8.25                     | 9.21                     |
|          | revPBE                    | 9.53                     | 5.82                      | 17.89                    | 11.08                    |
|          | PW91                      | 13.31                    | 5.54                      | 16.43                    | 11.76                    |
|          | RPBE                      | 11.17                    | 7.14                      | 19.46                    | 12.59                    |
|          | R48PBE                    | 17.78                    | 1.89                      | 21.38                    | 13.68                    |
|          | B97-D                     | 16.58                    | 10.62                     | 30.78                    | 19.33                    |
|          | BLYP                      | 13.01                    | 15.30                     | 31.23                    | 19.85                    |
|          | HCTH-407                  | 21.36                    | 12.98                     | 27.86                    | 20.73                    |
| Meta-GGA | mBEEF                     | 4.14                     | 0.93                      | 2.60                     | 2.56                     |
|          | TPSS                      | 6.01                     | 5.41                      | 1.78                     | 4.40                     |
|          | revSCAN                   | 5.37                     | 6.72                      | 3.04                     | 5.04                     |
|          | SCAN                      | 6.01                     | 7.79                      | 4.27                     | 6.02                     |
|          | revTPSS                   | 6.76                     | 10.76                     | 7.79                     | 8.44                     |
|          | TPSSloc                   | 14.66                    | 17.11                     | 17.03                    | 16.27                    |
| Hybrid   | HSE06                     | 11.23                    | 4.69                      | 8.23                     | 8.05                     |
|          | PBE0<br>(+TS)             | 12.36<br>(9.07)          | 5.21<br>(6.19)            | 8.24<br>(5.84)           | 8.60<br>(7.03)           |
|          | B3LYP                     | 19.04                    | 12.10                     | 27.26                    | 19.47                    |

Table S5. Surface energy ( $\text{J/m}^2$ ) and work function ( $\Phi$ , eV), calculated with the mBEEF density functional, for low- and high-index surfaces of Pd and Cu.

| Facet | Surface energy | $\Phi$ | Surface energy | $\Phi$ |
|-------|----------------|--------|----------------|--------|
|       | Pd             |        | Cu             |        |
| (111) | 1.32           | 5.17   | 1.43           | 4.83   |
| (100) | 1.50           | 4.99   | 1.56           | 4.53   |
| (110) | 1.58           | 4.80   | 1.63           | 4.33   |
| (332) | 1.41           | 4.99   | 1.57           | 4.60   |
| (322) | 1.45           | 5.00   | 1.55           | 4.58   |
| (221) | 1.49           | 4.61   | 1.58           | 4.12   |
| (210) | 1.59           | 4.92   | 1.70           | 4.49   |

## **References**

- [1] Gražulis S, Chateigner D, Downs RT, Yokochi AF, Quirós M, Lutterotti L, Manakova E, Butkus J, Moeck P, Le Bail A. Crystallography Open Database - an open-access collection of crystal structures. *J Appl Crystallogr.* **42**, 726–729 (2009).
- [2] Kittel C, Introduction to Solid State Physics, 8<sup>th</sup> Edition, John Wiley & Sons (2005)
